# Supplementary material for: Effectiveness of training general practitioners to improve the implementation of brief stop-smoking advice in German primary care: study protocol of a pragmatic, 2-arm cluster randomised controlled trial (the ABCII trial)
Source: Springer Nature journal article supplement (doi:10.1186/s12875-019-0986-8), 2019-07-27
Supplement: MOESM3 [file 17008476]

**Arzt-Patienten-Gespräch zum Gesundheitsverhalten**  
(Nachbefragung 4. Woche)

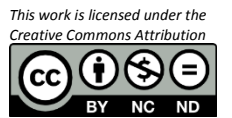

Datum von heute: \_\_\_\_\_ Pat. ID (vom Institut zu ergänzen): \_\_\_\_\_

Geburtsdatum: \_\_\_\_\_

Geschlecht:  weiblich /  männlich

(Bitte gehen Sie auf den folgenden Seiten die Fragen einzeln durch und kreuzen Sie die Antworten an, die für Sie zutreffend sind)

- 1.) Versuchen Sie sich bitte an Ihren Besuch bei Ihrer Hausärztin/ Ihrem Hausarzt, **vor ca. 4 Wochen**, zu erinnern. Dort haben Sie freundlicherweise an einer kurzen Befragung teilgenommen, die von einem/r Mitarbeiter/in vom Institut für Allgemeinmedizin (ifam) durchgeführt wurde.

Haben Sie **seit diesem Termin vor ca. 4 Wochen** einen oder mehrere Versuche unternommen mit dem Tabakrauchen aufzuhören? Machen Sie bitte **nur eine Angabe**.

- Ja  
 Nein → weiter mit Frage 9

**Die nachfolgenden Fragen 2-8 bitte nur beantworten, wenn Sie seit dem Termin bei Ihrer Hausärztin/ Ihrem Hausarzt vor ca. 4 Wochen mindestens einmal versucht haben, mit dem Rauchen aufzuhören (also Frage 1 mit „Ja“ beantwortet haben).**

- 2.) Können Sie angeben, wann Sie (nach diesem Arzttermin vor ca. 4 Wochen) den letzten Rauchstopp-Versuch gestartet haben? Sollten Sie dies nicht genau wissen, probieren sie eine ungefähre Angabe zu machen. Machen Sie bitte **nur eine Angabe**.

vor \_\_\_\_\_ Tagen **oder** vor \_\_\_\_\_ Wochen

3.) Können Sie angeben, was der **Hauptgrund** für Sie war diesen letzten Rauchstopp-Versuch zu unternehmen? Machen Sie bitte **nur eine Angabe.**

- Der Rat meiner Hausärztin/ meines Hausarztes mit dem Rauchen aufzuhören war für mich der Hauptgrund
- Das Rauchen wurde mir zu teuer
- Das Rauchen ist schädlich für meine Gesundheit
- Jemand aus meinem Familien- oder Bekanntenkreis hat mit dem Rauchen aufgehört
- Die Gesundheitswarnungen auf den Zigarettschachteln bzw. auf den Tabakpäckchen
- Jemand aus meinem Familien- oder Bekanntenkreis ist an einer Krankheit erkrankt, die durch das Rauchen entstehen kann (z.B. Krebs)
- Die Tatsache, dass das Rauchen an immer mehr Orten verboten ist
- Ein anderer Hauptgrund

4.) Wie lange hat dieser letzte Versuch, mit dem Rauchen aufzuhören, angehalten? Machen Sie bitte **nur eine Angabe.**

- Ich bin immer noch rauchfrei
- Weniger als einen Tag
- Weniger als eine Woche
- Weniger als einen Monat

5.) Haben Sie seit unserer Befragung vor ca. 4 Wochen noch einmal Ihre Hausärztin/ Ihren Hausarzt aufgesucht (hauptsächlich oder nur, um sich beim Rauchstopp beraten zu lassen? Machen Sie bitte **nur eine Angabe.**

- Ja, und zwar \_\_\_\_ Mal (bitte nur die Anzahl der Besuche bei der Hausärztin/ dem Hausarzt angeben, die Sie hauptsächlich oder nur wegen Ihres Rauchstopp-Versuches seit unserer letzten Befragung gemacht haben)
- Nein

***Bitte senden Sie den ausgefüllten Fragebogen  
in dem dafür vorgesehenen Rückumschlag  
so bald wie Ihnen möglich an uns zurück.***

***Vielen Dank***

10.) Wir möchten herausfinden, wie gut oder schlecht Ihre Gesundheit **HEUTE** ist?

- Diese Skala ist mit Zahlen von 0 bis 100 versehen.
- 100 ist die beste Gesundheit, die Sie sich vorstellen können.  
0 (Null) ist die schlechteste Gesundheit, die Sie sich vorstellen können.
- Bitte kreuzen Sie den Punkt auf der Skala an, der Ihre Gesundheit HEUTE am besten beschreibt.
- Jetzt tragen Sie bitte die Zahl, die Sie auf der Skala angekreuzt haben, in das Kästchen unten ein.

IHRE GESUNDHEIT HEUTE =

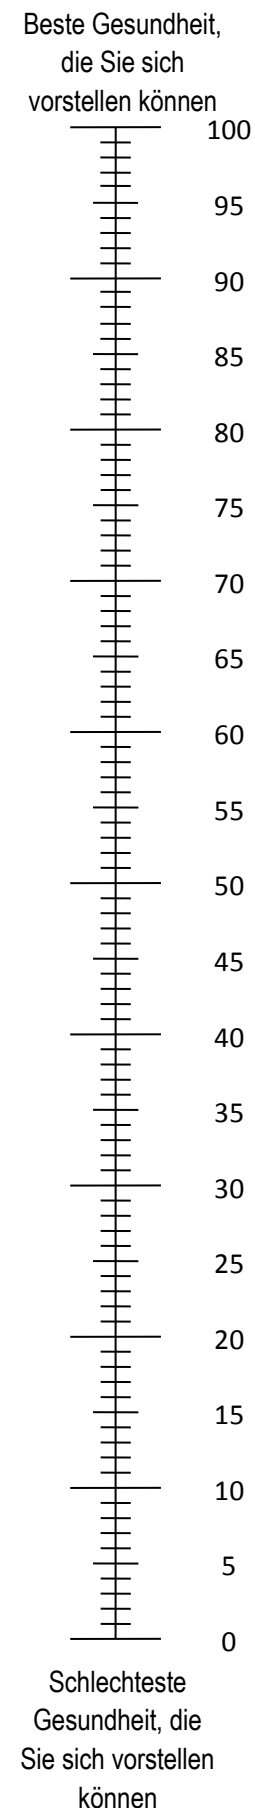

6.) Welche der folgenden Sachen/Methoden haben Sie bei diesem letzten Versuch unternommen, um Ihren Rauchstopp zu unterstützen? **Mehrere Antworten möglich.**

- Nikotinersatztherapie (z.B. Nikotinpflaster oder Nikotinkaugummis)
- Das Medikament Zyban (Bupropion)
- Das Medikament Champix (Vareniclin)
- Verhaltenstherapeutische Behandlung zur Rauchentwöhnung (z.B. Einzel- oder Gruppentherapie).
- Telefonische Beratung zur Rauchentwöhnung
- E-Zigarette mit Nikotin
- E- Zigarette ohne Nikotin
- Ein Buch zur Rauchentwöhnung (z.B. „Endlich Nichtraucher“ von Allen Carr)
- Eine App oder ein Internetprogramm zur Rauchentwöhnung (auf einem Smartphone, Tablet oder PC)
- Akupunktur
- Hypnotherapie
- Heilpraktiker/in
- Keine der genannten Sachen/Methoden → **weiter mit Frage 9**

7.) Können Sie sich daran erinnern, wieviel Geld Sie für diese unterstützenden Sachen/Methoden bei diesem letzten Rauchstopp-Versuch insgesamt ausgegeben haben? **Mehrere Antworten möglich.**

\_\_\_\_\_ € für Nikotinersatztherapie (z.B. Nikotinpflaster, Nikotinkaugummis, Nikotinsprays)

\_\_\_\_\_ € für Medikamente (z.B. Zyban, Champix)

\_\_\_\_\_ € für E-Zigaretten (sofern Sie als Hilfe bei der Rauchentwöhnung eingesetzt werden)

\_\_\_\_\_ € für therapeutische Behandlungen (z.B. Einzel- oder Gruppentherapie)

\_\_\_\_\_ € für andere Behandlungen (z.B. Akupunktur, Hypnotherapie, Heilpraktiker/in)

\_\_\_\_\_ € für andere Sachen/Methoden (z.B. Buch zur Rauchentwöhnung oder kostenpflichtige App)

Ich habe kein Geld ausgegeben → **weiter mit Frage 9**

Ich kann mich nicht mehr erinnern → **weiter mit Frage 9**

8.) Wenn Sie für eine oder mehrere dieser unterstützenden Sachen/Methoden bei diesem letzten Rauchstopp-Versuch Geld ausgegeben haben, hat Ihre Krankenkasse Ihnen davon etwas erstattet?

- Ja, und zwar insgesamt \_\_\_\_\_ €
- Nein, ich habe alles aus der eigenen Tasche bezahlt
- Ich weiß nicht, ob meine Krankenkasse das erstattet
- Ich habe keinen Antrag zur Kostenerstattung bei meiner Krankenkasse eingereicht
- Ich kann mich nicht mehr erinnern

**Die folgenden Aussagen beziehen sich abschließend auf ihren heutigen, allgemeinen Gesundheitszustand**

9.) Bitte kreuzen Sie unter jeder Überschrift DAS Kästchen an, das Ihre Gesundheit **HEUTE** am besten beschreibt? Machen Sie bitte nur eine Angabe pro Überschrift A) bis E).

**A) BEWEGLICHKEIT / MOBILITÄT**

- Ich habe keine Probleme herumzugehen
- Ich habe leichte Probleme herumzugehen
- Ich habe mäßige Probleme herumzugehen
- Ich habe große Probleme herumzugehen
- Ich bin nicht in der Lage herumzugehen

**B) FÜR SICH SELBST SORGEN**

- Ich habe keine Probleme, mich selbst zu waschen oder anzuziehen
- Ich habe leichte Probleme, mich selbst zu waschen oder anzuziehen
- Ich habe mäßige Probleme, mich selbst zu waschen oder anzuziehen
- Ich habe große Probleme, mich selbst zu waschen oder anzuziehen
- Ich bin nicht in der Lage, mich selbst zu waschen oder anzuziehen

**C) ALLTÄGLICHE TÄTIGKEITEN (z.B. Arbeit, Studium, Hausarbeit, Familien- oder Freizeitaktivitäten)**

- Ich habe keine Probleme, meinen alltäglichen Tätigkeiten nachzugehen
- Ich habe leichte Probleme, meinen alltäglichen Tätigkeiten nachzugehen
- Ich habe mäßige Probleme, meinen alltäglichen Tätigkeiten nachzugehen
- Ich habe große Probleme, meinen alltäglichen Tätigkeiten nachzugehen
- Ich bin nicht in der Lage, meinen alltäglichen Tätigkeiten nachzugehen

**D) SCHMERZEN / KÖRPERLICHE BESCHWERDEN**

- Ich habe keine Schmerzen oder Beschwerden
- Ich habe leichte Schmerzen oder Beschwerden
- Ich habe mäßige Schmerzen oder Beschwerden
- Ich habe starke Schmerzen oder Beschwerden
- Ich habe extreme Schmerzen oder Beschwerden

**E) ANGST / NIEDERGESCHLAGENHEIT**

- Ich bin nicht ängstlich oder deprimiert
- Ich bin ein wenig ängstlich oder deprimiert
- Ich bin mäßig ängstlich oder deprimiert
- Ich bin sehr ängstlich oder deprimiert
- Ich bin extrem ängstlich oder deprimiert
