# Supplementary material for: Effectiveness of training general practitioners to improve the implementation of brief stop-smoking advice in German primary care: study protocol of a pragmatic, 2-arm cluster randomised controlled trial (the ABCII trial)
Source: BMC Fam Pract. 2019 Jul 27;20:107. doi: 10.1186/s12875-019-0986-8 (PMC6660716; doi:10.1186/s12875-019-0986-8)
Supplement: Supplementary file 4 — Follow-upSurveyWeek4_ABCII_Engl. (PDF 537 kb) [file 12875_2019_986_MOESM4_ESM.pdf]

## Follow-up questionnaire week 4 (Translation from German)

This work is licensed under the  
Creative Commons Attribution

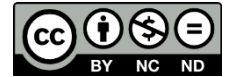

### Physician-patient communication on health behaviour

(Please answer the questions on the following pages point-by-point  
and tick off the answers that apply to you)

- 1.) Please try to recall your last consultation with your general practitioner / family doctor, **about 4 weeks ago**. You kindly participated in a short survey, which was conducted by an employee of the Institute of General Practice (ifam).

Have you made one or more attempt(s) to quit smoking **since this last consultation 4 weeks ago**?  
Please choose **only one answer**.

- ☐ Yes  
☐ No → **continue with question 9**

Please **only answer the following questions 2-8** if you have made at least one attempt to quit smoking since your last appointment with your general practitioner **about 4 weeks ago**  
(= if you answered question 1 with "Yes").

- 2.) Can you specify when (since this last consultation with your general practitioner about 4 weeks ago) you have started your **last** quit attempt? In case you cannot recall, please try to approximate. Please choose **only one answer**.

\_\_\_\_\_ days ago      **or**      \_\_\_\_\_ weeks ago

- 3.) Can you recall what the **main reason** for this **last** quit attempt was? Please choose **only one answer**.

- ☐ My general practitioner's advice to quit was the main reason  
☐ Smoking became too expensive for me  
☐ Smoking is harmful to my health  
☐ Someone from my family or circle of acquaintances has quit smoking  
☐ The health warnings on cigarette or tobacco packages  
☐ Someone from my family or circle of acquaintances got a disease that can be caused by smoking (e.g., cancer)  
☐ The fact that smoking is being banned at more and more places  
☐ Another main reason

***Please continue to the next page!***

4.) How long did this most recent quit attempt last before you went back to smoking?

Please choose **only one answer.**

- ☐ I am still not smoking
- ☐ Less than a day
- ☐ Less than a week
- ☐ Less than a month

5.) Have you consulted your general practitioner since our survey about 4 weeks ago mainly or solely to get behavioural support for smoking cessation? Please choose **only one answer.**

- ☐ Yes, \_\_\_\_ times (please only state the number of consultations mainly or solely because of your attempt to quit smoking since our last survey)
- ☐ No

6.) Which of the following products / methods have you tried to assist this last quit attempt?

**Multiple answers allowed.**

- ☐ Nicotine replacement product (e.g., nicotine patches or nicotine gums)
- ☐ The drug Zyban (Bupropion)
- ☐ The drug Champix (Varenicline)
- ☐ Behavioural therapy for smoking cessation (e.g., single or group therapy)
- ☐ Telephone counselling for smoking cessation
- ☐ E-Cigarettes with nicotine
- ☐ E-Cigarettes without nicotine
- ☐ A book on smoking cessation (e.g., "Easyway" by Allen Carr)
- ☐ An app or internet program for smoking cessation (on a smartphone, tablet or computer)
- ☐ Acupuncture
- ☐ Hypnotherapy
- ☐ Alternative practitioner / naturopath
- ☐ None of the above mentioned products / methods → **continue with question 9**

***Please continue to the next page!***

7.) Can you recall how much money you spent in total for these products / methods to assist this last quit attempt? **Multiple answers allowed.**

\_\_\_\_\_ € for nicotine replacement therapy (e.g., nicotine patches, nicotine gums, nicotine sprays)

\_\_\_\_\_ € for drugs (e.g., Zyban, Champix)

\_\_\_\_\_ € for e-cigarettes (if used as an aid to quit smoking)

\_\_\_\_\_ € for behavioural therapy (e.g., single or group therapy)

\_\_\_\_\_ € for other treatment (e.g., acupuncture, hypnotherapy, alternative practitioner / naturopath)

\_\_\_\_\_ € for other products/methods (e.g., book on smoking cessation or chargeable app)

☐ I spent no money → **continue with question 9**

☐ I cannot remember → **continue with question 9**

8.) In case you spent money on one or more of these products / methods during this last quit attempt, did health insurance reimburse any of it?

☐ Yes, a total of \_\_\_\_\_ €

☐ No, I paid everything out of my own pocket

☐ I don't know if my health insurance offers such reimbursement

☐ I did not submit any request for reimbursement to my health insurance

☐ I cannot remember

***Please continue to the next page!***

**The following final set of questions is related to your current  
general state of health\***

**9.)** Under each heading, please tick the ONE box that describes your health **TODAY** best. Please choose only one answer per heading **A) to E).**

**A) MOBILITY / FLEXIBILITY**

- ☐ I have no problems in walking around
- ☐ I have slight problems in walking around
- ☐ I have moderate problems in walking around
- ☐ I have severe problems in walking around
- ☐ I am unable to walk around

**B) SELF-CARE**

- ☐ I have no problems washing or dressing myself
- ☐ I have slight problems washing or dressing myself
- ☐ I have moderate problems washing or dressing myself
- ☐ I have severe problems washing or dressing myself
- ☐ I am unable to wash or dress myself

**C) USUAL ACTIVITIES (e.g., work, study, housework, family or leisure activities)**

- ☐ I have no problems doing my usual activities
- ☐ I have slight problems doing my usual activities
- ☐ I have moderate problems doing my usual activities
- ☐ I have severe problems doing my usual activities
- ☐ I am unable to do my usual activities

**D) PAIN / DISCOMFORT**

- ☐ I have no pain or discomfort
- ☐ I have slight pain or discomfort
- ☐ I have moderate pain or discomfort
- ☐ I have severe pain or discomfort
- ☐ I have extreme pain or discomfort

***Please continue to the next page!***

### E) ANXIETY / DEPRESSION

- ☐ I am not anxious or depressed
- ☐ I am slightly anxious or depressed
- ☐ I am moderately anxious or depressed
- ☐ I am very anxious or depressed
- ☐ I am extremely anxious or depressed

10.) We would like to know how good or poor your health **TODAY**.

- Imagine a scale (like a standing up ruler)
- The top of the scale is marked with 100, the bottom with zero (0)
- 100 (top) means the best health you can imagine.  
0 (bottom) means the worst health you can imagine.
- Mark an X on the scale to indicate how is your health today
- Now, please note the number your marked in the box below.

YOUR HEALTH TODAY =

The best health  
you can imagine

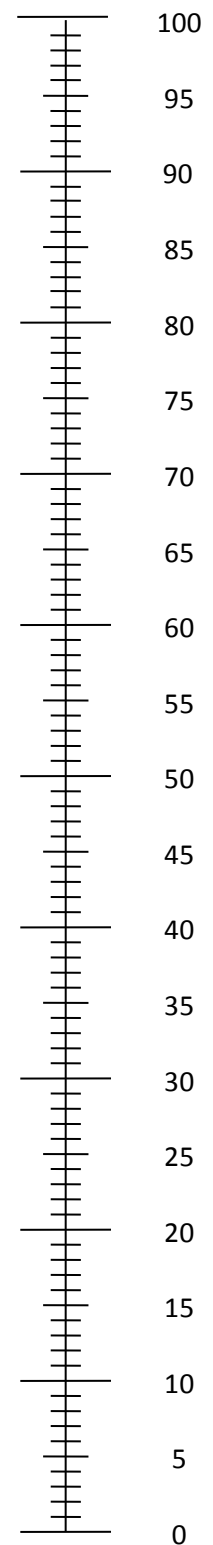

The worst health you  
can imagine.

\*Rabin R, de Charro F. EQ-5D: a measure of health status from the EuroQol Group. Ann Med 2001;33:337-43.
